# Supplementary material for: HuRdling Senescence: HuR Breaks BRAF-Induced Senescence in Melanocytes and Supports Melanoma Growth
Source: MDPI journal article supplement (doi:10.3390/cancers12051299), 2020-05-21
Supplement: s1 [file s1]

## Supplementary Materials

# HuRdling Senescence: HuR Breaks BRAF-Induced Senescence in Melanocytes and Supports Melanoma Growth

Janika K. Liebig, Silke Kuphal and Anja Katrin Bosserhoff

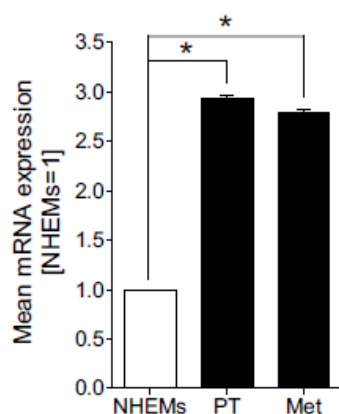

**Figure S1.** Mean expression of mRNAs in NHEMs and primary and metastatic melanoma cells. Data from cDNA array (Gene Omnibus (GEO) database (GSE108969)). Expression in NHEMs = 1. Expression levels of 28536 genes were involved in the calculation.

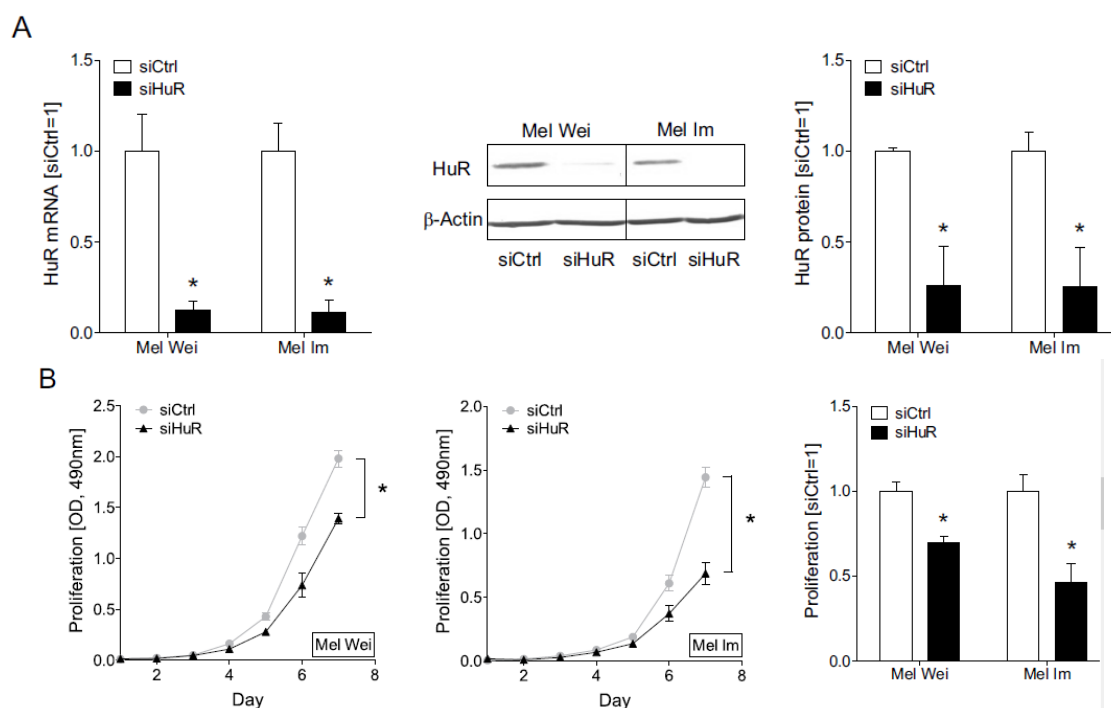

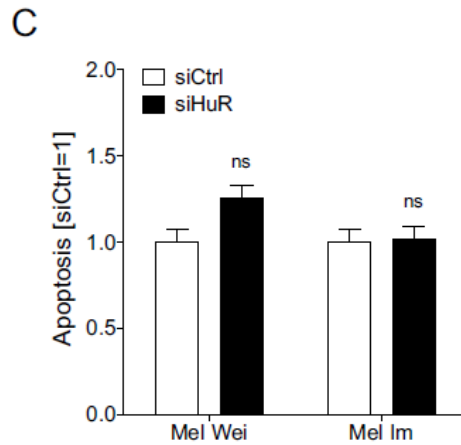

**Figure S2. A** Transfection control for siHuRpool and siCtrlpool transfection. Relative expression of HuR mRNA in transfected Mel Wei and Mel Im cells (siCtrl=1) (left). Densitometric quantification (right) and exemplary image (middle) of western blot analysis of HuR protein levels in transfected Mel Wei and Mel Im cells (siCtrl=1). **B** Exemplary proliferation curves of Mel Wei and Mel Im cells resulting from a XTT assay (left panel) and quantified 'OD' (proliferative ability, siCtrl=1) (right panel). **C** FACS-based analysis of apoptosis in transfected Mel Wei and Mel Im cells (siCtrl=1).

Transfection control for siHuRpool and siCtrlpool transfection (shown membrane=> n=1)

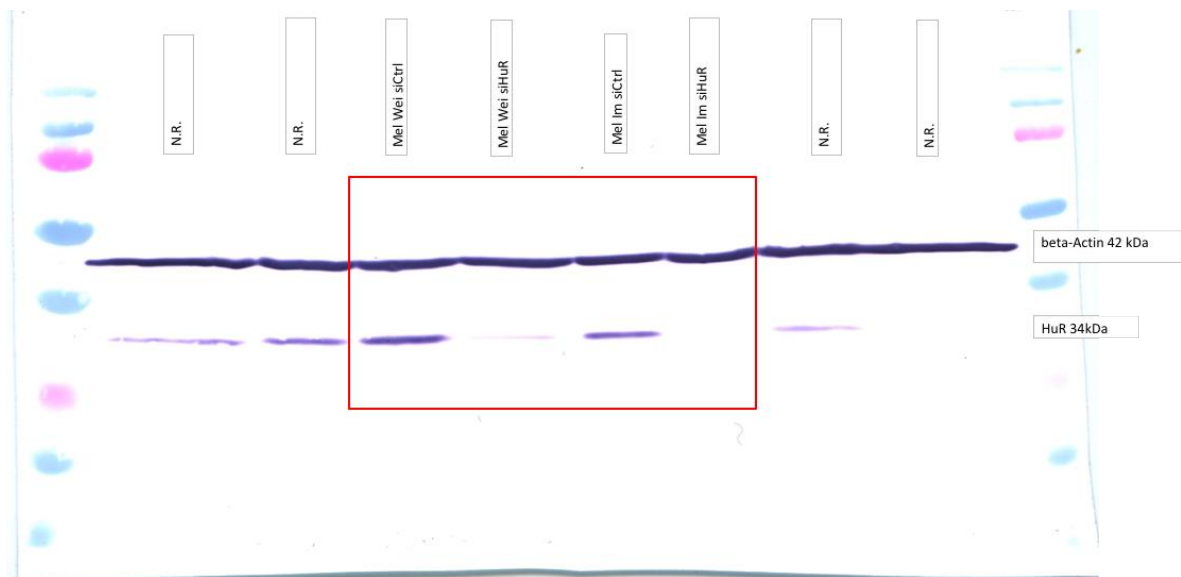

HuR normal. to beta-Actin:

|                | n=1       | n=2       | n=3       |
|----------------|-----------|-----------|-----------|
| Mel Wei siCtrl | 1.934.363 | 1.715.308 | 1.646.097 |
| Mel Wei siHuR  | 345.849   | 714.881   | 568.587   |
| Mel Im siCtrl  | 6.601.167 | 1.563.972 | 1.924.312 |
| Mel Im siHuR   | 77.536    | 547.075   | 761.333   |

The uncropped blots and molecular weight markers of Figure S2A. (Samples labeled with "N.R." (not relevant) are part of other studies and not relevant for this study)

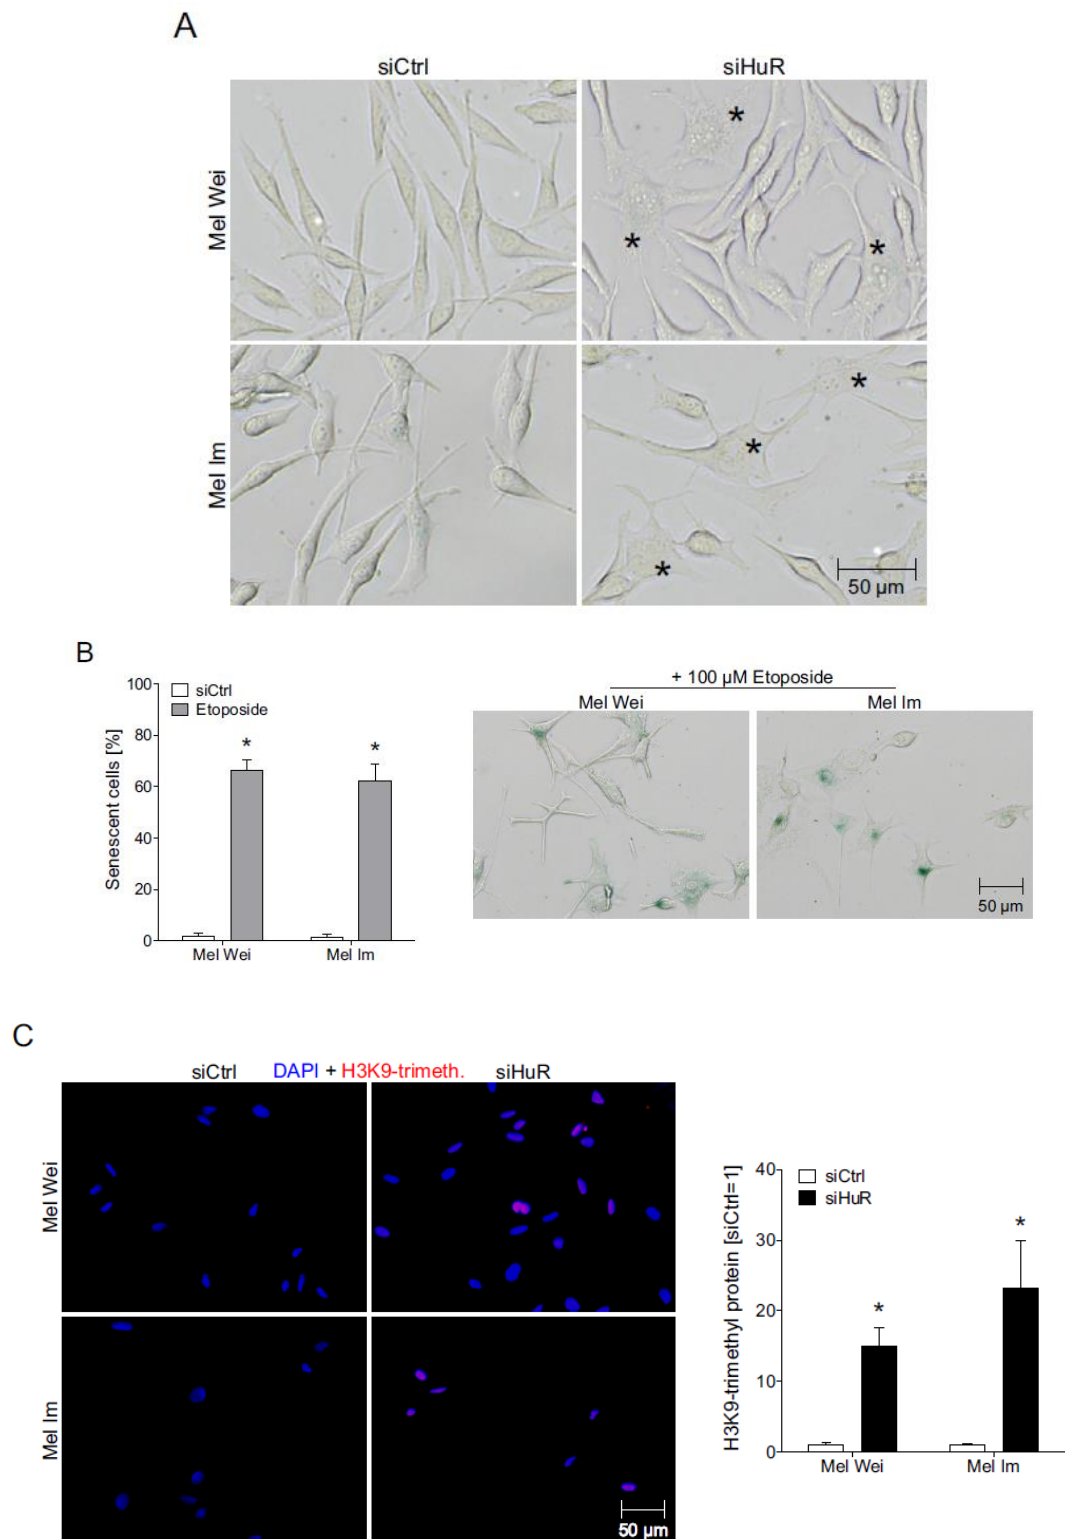

**Figure S3. A** Exemplary images of light microscopic examination of siCtrl and siHuR transfected Mel Wei and Mel Im cells. Enlarged cells marked with asterisks. **B** Exemplary images of light microscopic examination of SA- $\beta$ -galactosidase staining in etoposide treated Mel Wei and Mel Im cells (positive control) (right). The percentages of SA- $\beta$ -galactosidase positive cells (blue) were calculated (left) (siCtrl=1). **C** Exemplary images of H3K9-trimethyl immunofluorescence staining of Mel Wei and Mel Im cells. Panels show overlays of H3K9-trimethyl (red) and DAPI (blue) staining (left). The graph shows the amount of H3K9-trimethyl protein (right) (siCtrl=1).

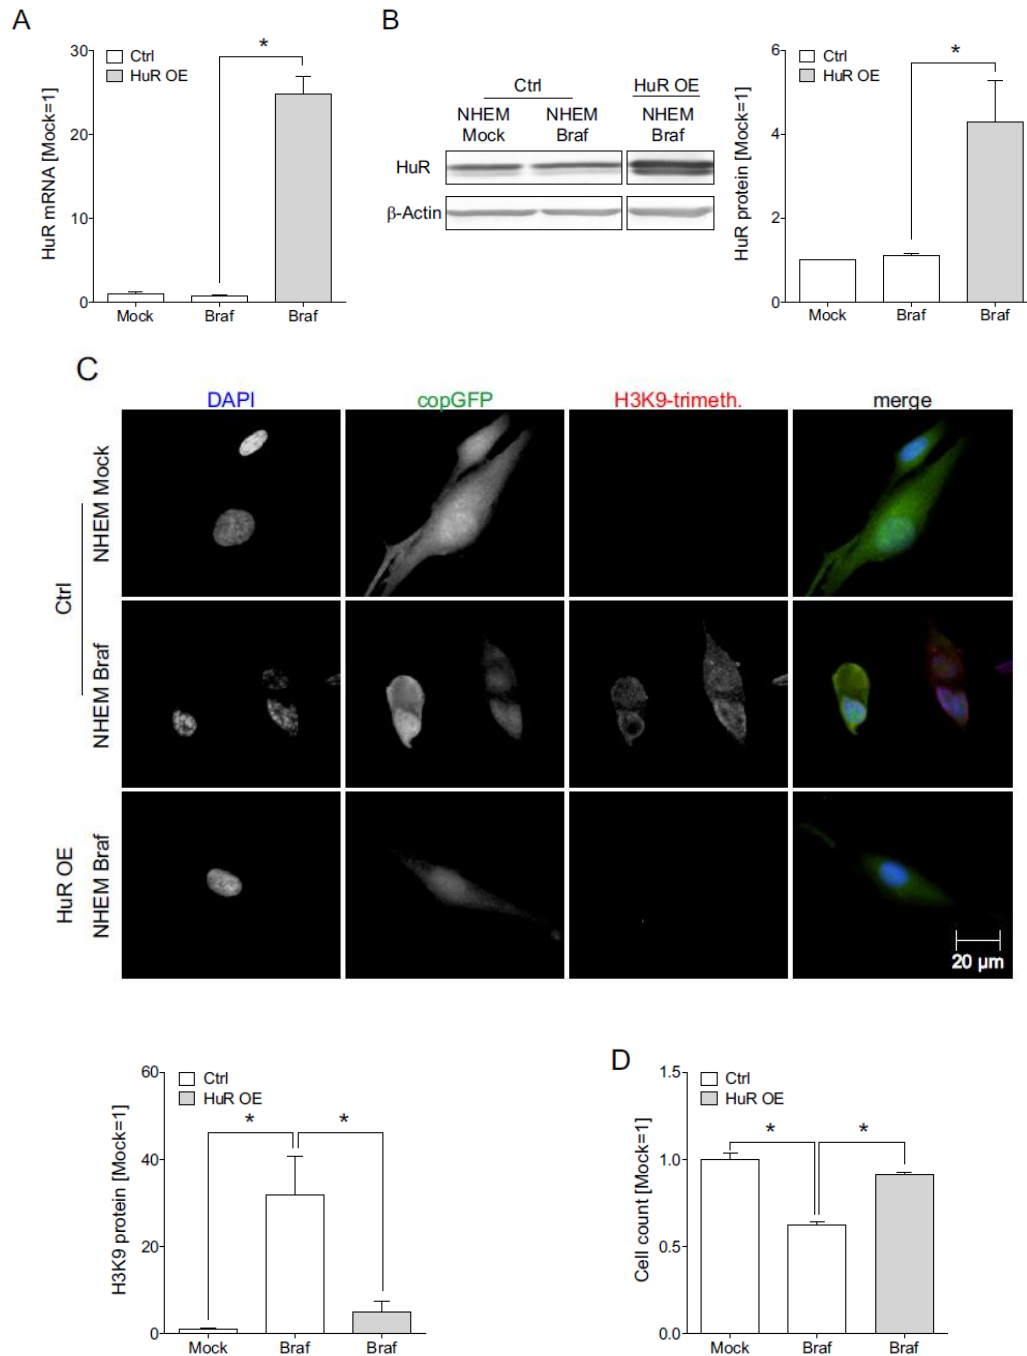

**Figure S4. A** Transduction control for HuR OE. Relative expression of HuR mRNA in NHEM Mock, NHEM *Brav<sup>V600E</sup>* and NHEM *Brav<sup>V600E</sup>/HuR OE* cells (Mock=1). **B** Exemplary image of western blot analysis of HuR protein in NHEM Mock, NHEM *Brav<sup>V600E</sup>* and NHEM *Brav<sup>V600E</sup>/HuR OE* cells (left). Densitometric quantification of HuR protein in NHEM Mock, NHEM *Brav<sup>V600E</sup>* and NHEM *Brav<sup>V600E</sup>/HuR OE* cells (Mock=1) (right). **C** Exemplary images of H3K9-trimethyl immunofluorescence staining of NHEM Mock, NHEM *Brav<sup>V600E</sup>* and NHEM *Brav<sup>V600E</sup>/HuR OE* cells (red) and DAPI (blue) staining. CopGFP served as a transduction control (green) (upper). The graph shows the amount of H3K9-trimethyl protein (Mock=1) (lower). For better recognition, colors are only shown in overlay, not in single pictures. **C** The graph shows the cell count of NHEM Mock, NHEM *Brav<sup>V600E</sup>* and NHEM *Brav<sup>V600E</sup>/HuR OE* cells one week after transduction (Mock=1).

Transduction control for lentiviral HuR Overexpression (shown membrane=> n=1)

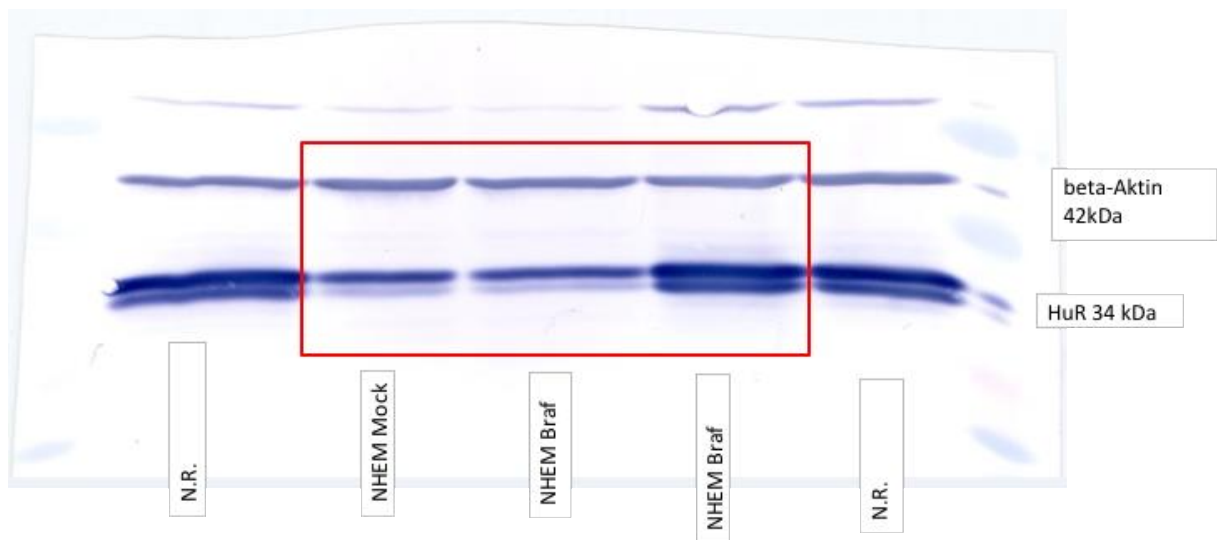

HuR normal. to beta-Actin:

|          | n=1     | n=2     | n=3     |
|----------|---------|---------|---------|
| Mock     | 73.723  | 68.079  | 251.064 |
| Braf     | 90.413  | 90.865  | 301.502 |
| Braf HuR | 368.871 | 379.654 | 583.322 |

The uncropped blots and molecular weight markers of Figure S4B. (Samples labeled with "N.R." (not relevant) are part of other studies and not relevant for this study)

HuR level in melanoma cells compared to NHEMs (shown membrane=> n=1)

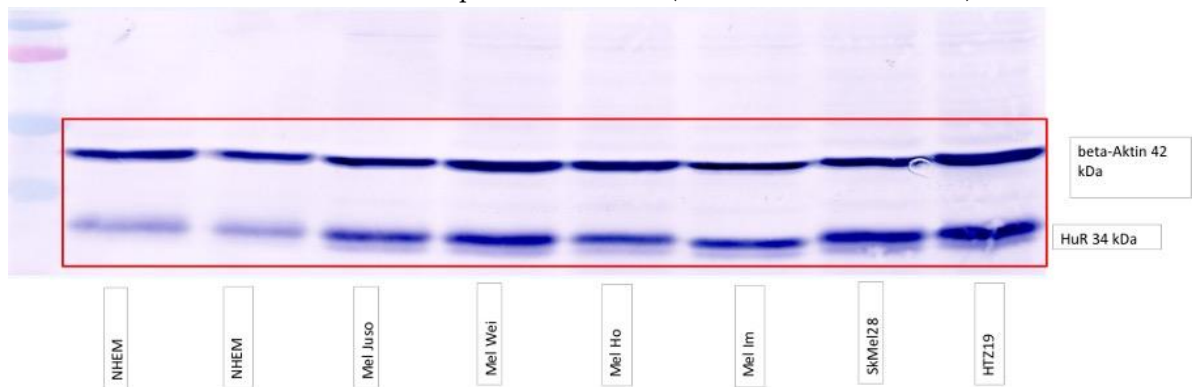

beta-Aktin and HuR:

⇒ n=1:

|          | beta-Aktin | HuR        |
|----------|------------|------------|
| NHEM p7  | 5.491.527  | 3.486.933  |
| NHEM p6  | 5.082.062  | 3.609.518  |
| Mel Juso | 5.597.648  | 6.992.468  |
| Mel Wei  | 7.042.770  | 9.053.468  |
| Mel Ho   | 6.399.820  | 7.062.640  |
| Mel Im   | 5.366.113  | 6.655.983  |
| SkMel28  | 6.164.941  | 10.110.468 |
| HTZ19    | 8.742.376  | 12.224.125 |

⇒ n=2:

|         | beta-Aktin | HuR       |
|---------|------------|-----------|
| NHEM p7 | 5.864.891  | 1.573.134 |
| NHEM p7 | 6.608.770  | 3.973.740 |
| NHEM p7 | 7.938.305  | 4.924.397 |
| Mel Wei | 7.274.355  | 8.249.205 |
| Mel Ho  | 6.681.426  | 5.425.225 |
| Mel Im  | 5.836.648  | 5.240.205 |
| SkMel28 | 5.335.991  | 6.175.497 |
| HTZ19   | 6.682.527  | 5.189.205 |

⇒ n=3:

|          | HuR        | beta-Aktin  |
|----------|------------|-------------|
| NHEM p7  | 23.223.966 | 70.051.693  |
| NHEM p8  | 53.791.087 | 98.531.208  |
| Mel Juso | 59.350.673 | 86.227.844  |
| Mel Wei  | 73.872.329 | 106.511.865 |
| Mel Ho   | 43.851.702 | 79.388.995  |
| Mel Im   | 60.087.551 | 32.745.066  |
| SkMel28  | 64.926.421 | 75.291.208  |
| Htz19d   | 70.972.421 | 74.184.300  |

**Figure S5.** The uncropped blots and molecular weight markers of Figure 1D. (Samples labeled with "N.R." (not relevant) are part of other studies and not relevant for this study).

HuR level in melanoma cells after miR-194-mimic transfection (shown membranes=> n=1)  
For this blot, ECL western blot detection was used. The western blot marker is cropped into the membrane via the ECL software during detection of the bands.

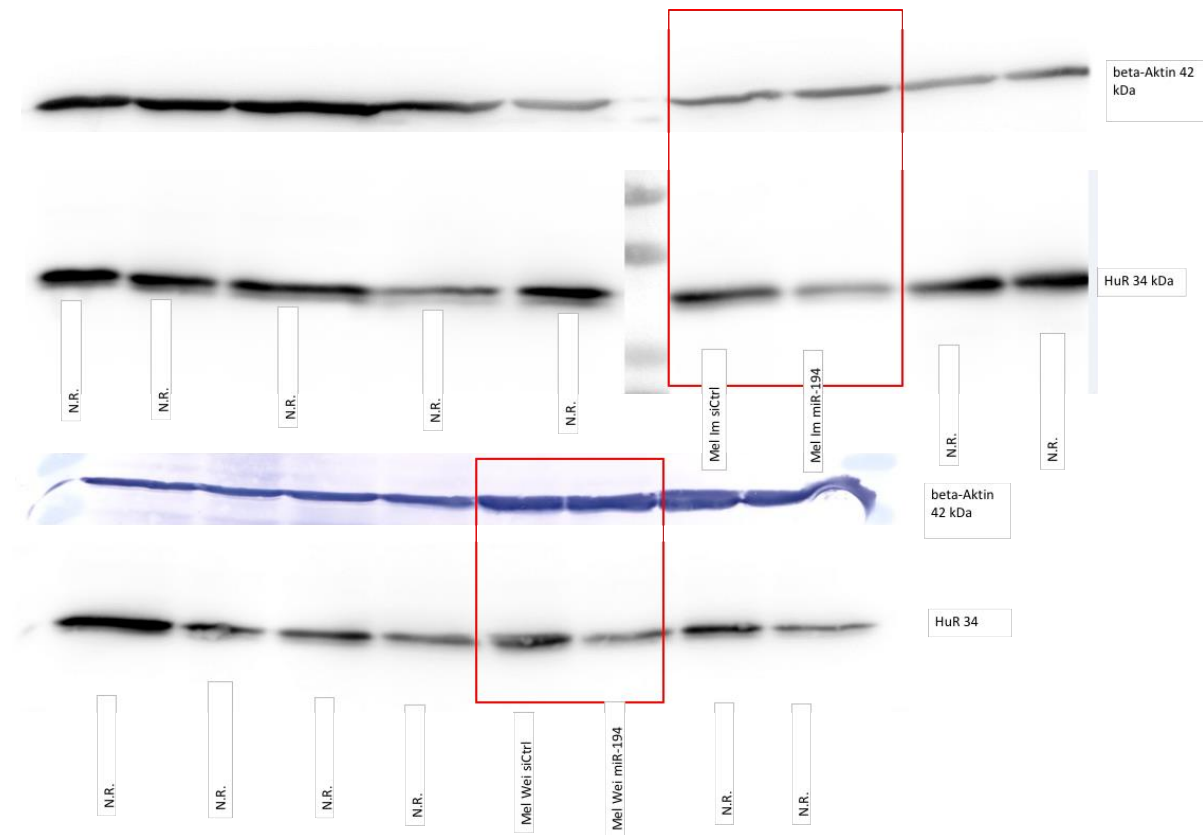

beta-Actin and HuR:

| 1 |                 | HuR         | beta-Act    |
|---|-----------------|-------------|-------------|
|   | Mel Wei siCtrl  | 1.591.956   | 139368816   |
|   | Mel Wei miR-194 | 1.561.157   | 213711616   |
|   | Mel Im siCtrl   | 505.117     | 40542540    |
|   | Mel Im miR-194  | 664.387     | 97301816    |
| 2 |                 | HuR         | beta-Act    |
|   | Mel Wei siCtrl  | 323.045.792 | 191.124.736 |
|   | Mel Wei miR-194 | 148.046.912 | 199.514.192 |
|   | Mel Im siCtrl   | 334.201.824 | 129.838.936 |
|   | Mel Im miR-194  | 303.958.048 | 177.035.024 |
| 3 |                 | HuR         | beta-Act    |
|   | Mel Wei siCtrl  | 137.562.688 | 65.166.408  |
|   | Mel Wei miR-194 | 82.440.512  | 45.094.860  |
|   | Mel Im siCtrl   | 68.585.432  | 4.829.851   |
|   | Mel Im miR-194  | 82.180.880  | 19.273.710  |

**Figure S6.** The uncropped blots and molecular weight markers of Figure 2D. (Samples labeled with "N.R." (not relevant) are part of other studies and not relevant for this study).

HuR localization in melanoma cells and NHEM (Nucleus/Cytoplasm) (shown membranes=> n=1)  
No quantification!

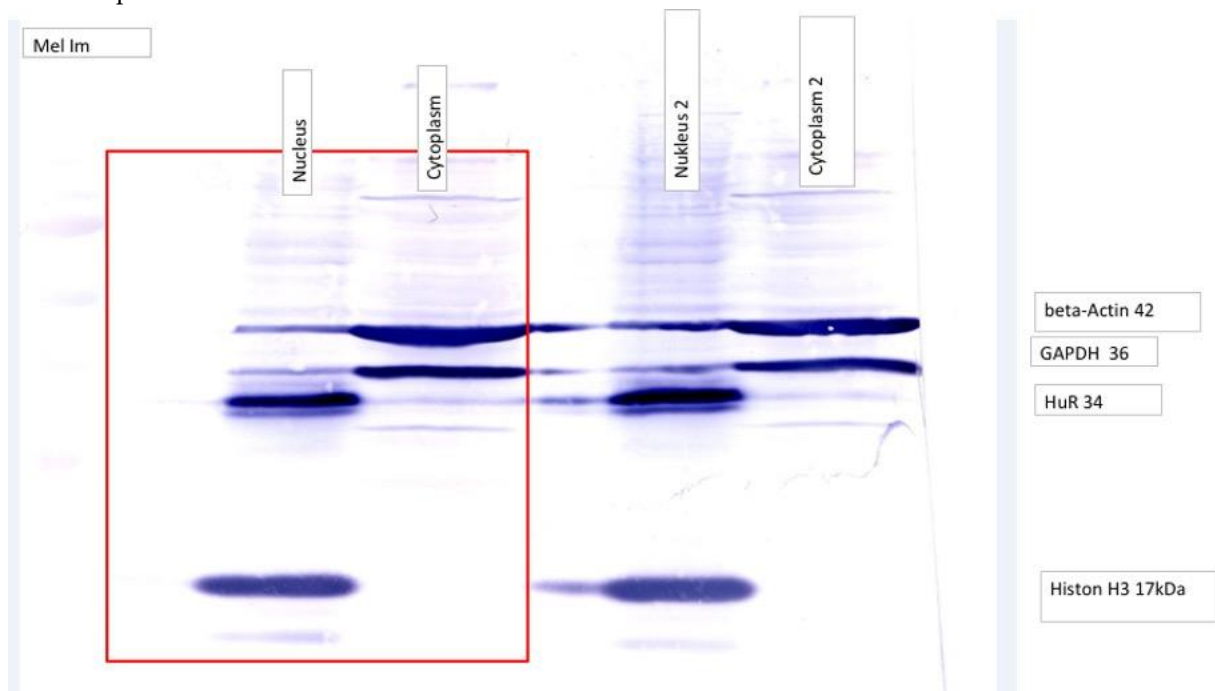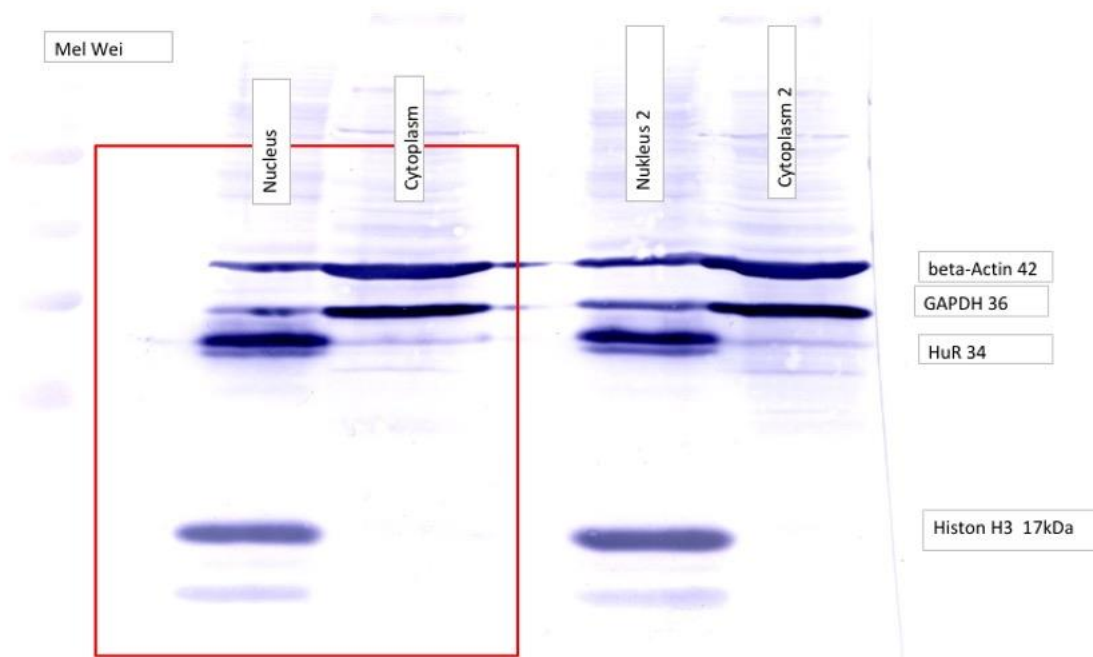



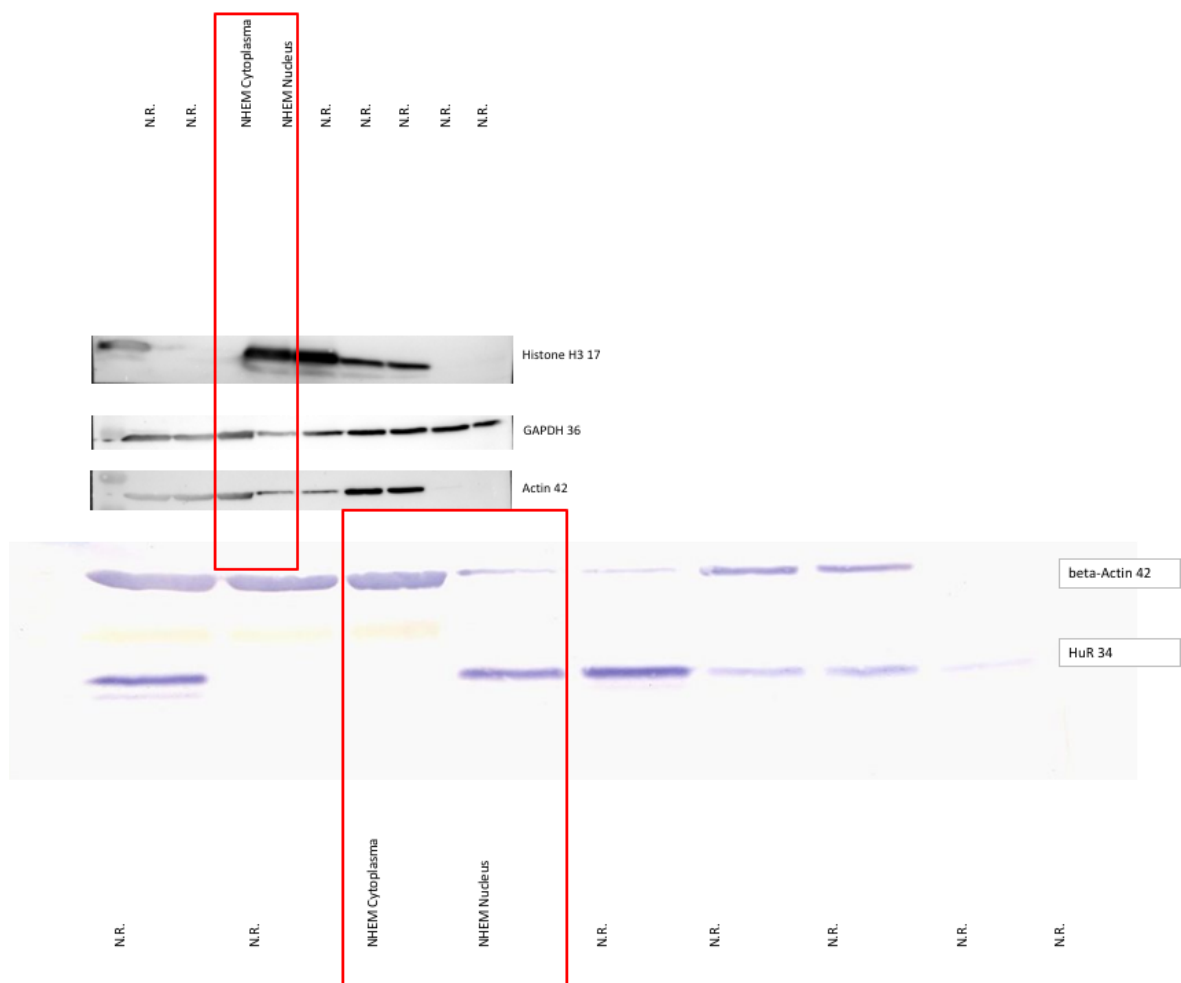

**Figure S7.** The uncropped blots and molecular weight markers of Figure 3A. (Samples labeled with “N.R.” (not relevant) are part of other studies and not relevant for this study).

Influence of siHuRpool KD on cyclin D1 level in melanoma cells (shown membranes=> n=1)

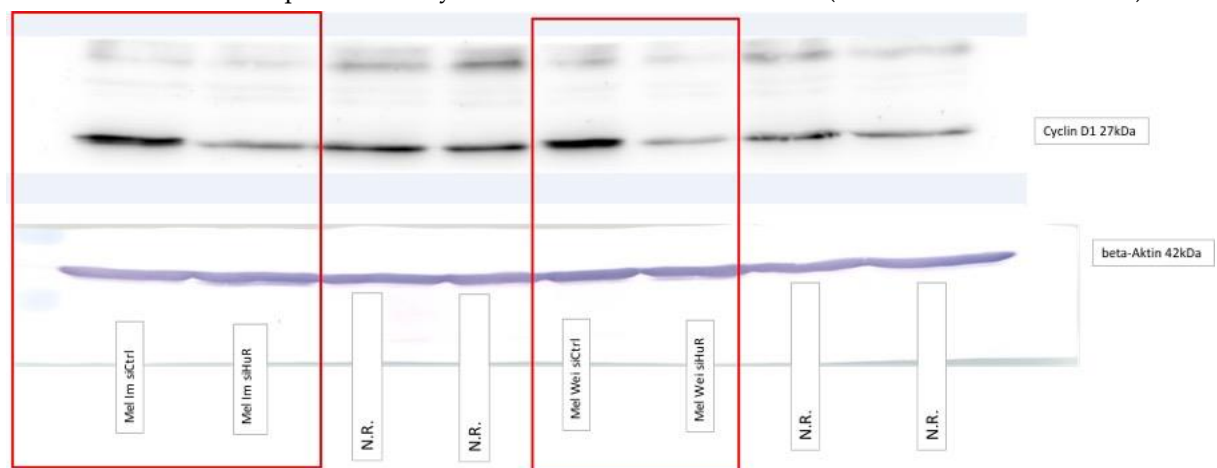

CyclinD1 normal. to beta-Actin:

|         | siCtrl  |        |         |         |         |        | siHuR  |        |         |        |        |        |
|---------|---------|--------|---------|---------|---------|--------|--------|--------|---------|--------|--------|--------|
| Mel Wei | 1092751 | 694782 | 2409110 | 2009810 | 1020877 | 757339 | 544379 | 383328 | 1134012 | 624239 | 388652 | 528407 |
| Mel Im  | 1301718 | 949003 | 1996500 | 1327007 | 1610510 | 803924 | 423258 | 445885 | 1557270 | 640211 | 918390 | 644204 |

**Figure S8.** The uncropped blots and molecular weight markers of Figure 4E. (Samples labeled with “N.R.” (not relevant) are part of other studies and not relevant for this study).

Influence of siHuRpool KD on MITF level in melanoma cells (shown membranes=> n=1)

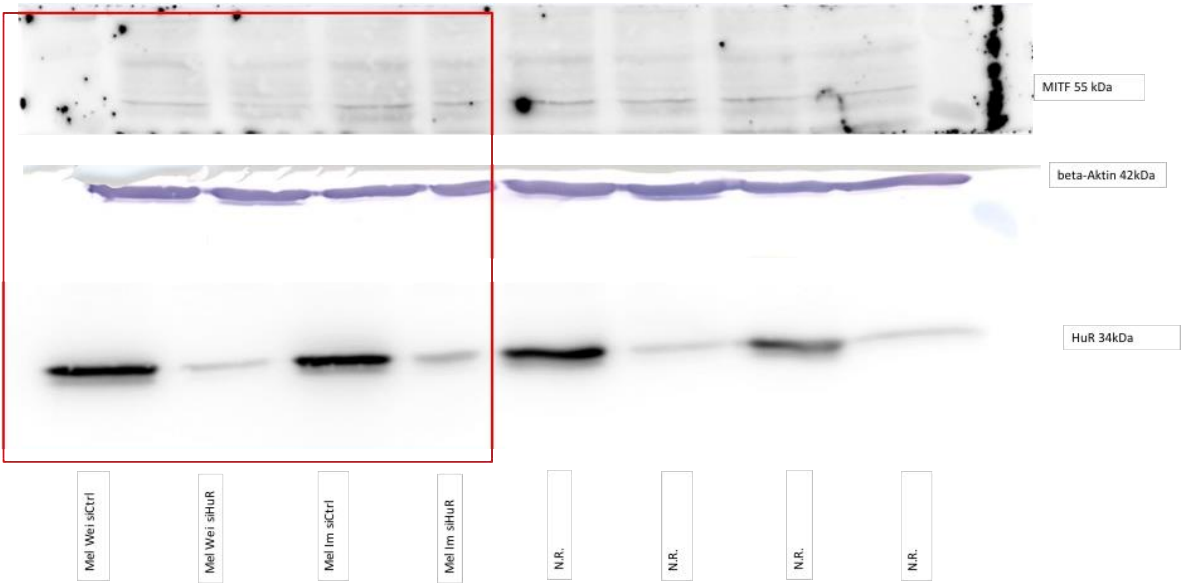

MITF normal. to beta-Actin:

|                | Volumen   |
|----------------|-----------|
| Mel Im siCtrl  | 480.829   |
| Mel Im siHuR   | 308.088   |
| Mel Wei siCtrl | 229.848   |
| Mel Wei siHuR  | 122.196   |
| Mel Im siCtrl  | 1.032.464 |
| Mel Im siHuR   | 676.200   |
| Mel Wei siCtrl | 1.553.024 |
| Mel Wei siHuR  | 813.741   |

**Figure S9.** The uncropped blots and molecular weight markers of Figure 5C. (Samples labeled with “N.R.” (not relevant) are part of other studies and not relevant for this study).

Influence of lentiviral HuR overexpression on MITF level in NHEMs (shown membranes=> n=1)  
(see also Figure S4 for HuR & beta-Act)

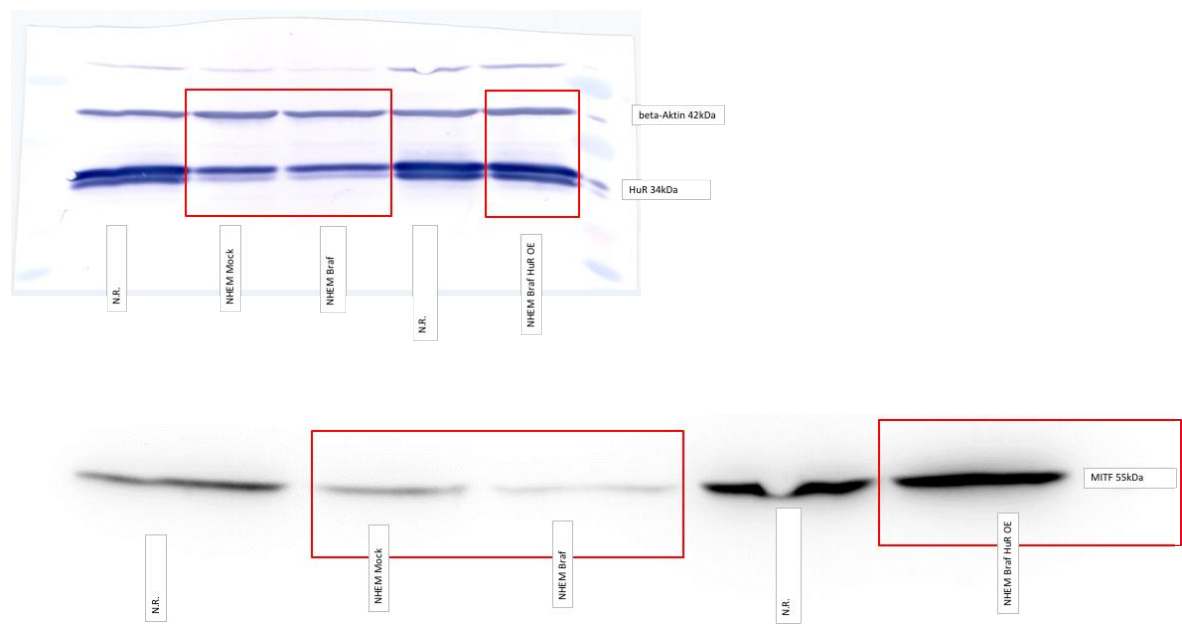

MITF normal. to beta-Actin:

|                  |          |          |          |
|------------------|----------|----------|----------|
| NHEM Mock        | 1189,406 | 926,0586 | 2188,756 |
| NHEM BRAF        | 1430,871 | 280,1593 | 2205,545 |
| NHEM BRAF HuR OE | 379,7224 | 179,3351 | 2441,641 |

**Figure S10.** The uncropped blots and molecular weight markers of Figure 7D. (Samples labeled with “N.R.” (not relevant) are part of other studies and not relevant for this study).

**Table S1.** 150 randomly chosen ARE-containing mRNAs.

| ELOVL5   | E2F7     | CALCOCO1 |
|----------|----------|----------|
| NRAS     | ADAT1    | EHD2     |
| CYP51A1  | WAPAL    | IFT88    |
| ZZZ3     | MAP2K1   | EPHA3    |
| ZFYVE16  | DERA     | YAF2     |
| PTBP1    | LAP3     | ZNF200   |
| CCND1    | ADSS     | NOTCH3   |
| ABCC2    | CCDC90A  | PPP1R3F  |
| SLAMF7   | MAPKAP1  | MAPK4    |
| RGPD5    | CCND3    | SMAD6    |
| PTEN     | NUP160   | CRAMP1L  |
| RANBP9   | C1orf124 | MAP9     |
| INSIG1   | MAP4K4   | MAP3K13  |
| DICER1   | RABGAP1  | RGNEF    |
| NOTCH2NL | FOXN3    | MAP7     |
| MAPRE1   | GCLM     | TIMP2    |
| IBTK     | PLAUR    | MYO16    |
| ZC3H15   | TP53RK   | IL6      |
| CREB1    | GABRA3   | PKP2     |
| TNPO3    | FAM120A  | MAP2K6   |
| CUL3     | RALBP1   | ITGB2    |
| MAPK6    | ITGA4    | PRDM1    |
| KPNA6    | ARID1B   | IL13     |
| KIAA0776 | FAM76A   | BCAS1    |
| MAP3K7   | ITGA2    | COL11A1  |
| ATP11B   | ETV1     | CCDC85A  |
| PKN2     | HSF2     | SLC18A1  |
| SKAP2    | KIAA1539 | CDKL3    |
| HEATR5B  | PER3     | XK       |
| CCDC99   | AIFM2    | IL10     |
| PHTF2    | PRKAR2B  | MAP3K15  |
| TRAF3IP2 | CCDC132  | IYD      |
| MBTPS2   | CDON     | ADAM22   |
| SLC12A2  | C2orf3   | ODZ1     |
| TRIO     | E2F5     | ARHGAP6  |
| SLC30A9  | FAS      | ITGB6    |
| RIOK2    | INSIG2   | USH2A    |
| MON2     | MAP3K4   | ASB4     |
| UBR2     | CYFIP2   | ADAMTS6  |
| DCUN1D1  | MAP3K12  | LRRC7    |
| EIF2AK2  | KIAA1370 | PAX6     |
| NSUN2    | STAU2    | ADAM28   |
| TCEB3    | SMAD3    | CD38     |
| SLK      | ARID4B   | UPP2     |
| PRKCH    | E2F8     | HGF      |
| KIF1B    | ARID4A   | CDH10    |
| PGM3     | ATP9A    | LY75     |
| C12orf4  | MCM10    | TFPI     |
| CYR61    | ST7L     | IL15     |
| SMAD2    | CENPQ    | MSH4     |

**Table S2.** List of primary antibodies.

| Antigen/Size            | Species       | Method   | Dilution                                                             | Manufacturer                                  |
|-------------------------|---------------|----------|----------------------------------------------------------------------|-----------------------------------------------|
| $\beta$ -Actin<br>(42)  | <i>mouse</i>  | WB       | 1:5000<br>in TBS-T                                                   | Sigma-Aldrich Chemie GmbH, Steinheim, Germany |
| Cyclin D1<br>(34 - 40)  | <i>mouse</i>  | WB       | 1:1000<br>in 5 % MP / TBS-T                                          | Santa Cruz Biotechnology, Inc., Dallas, USA   |
| GAPDH<br>(36)           | <i>rabbit</i> | WB       | 1:1000<br>in 5 % BSA / TBS-T                                         | Cell Signaling Technology, Danvers, MA, USA   |
| H3K9-trimethyl.<br>(17) | <i>rabbit</i> | IF       | 1:200 in PBS                                                         | Merck, Darmstadt, Germany                     |
| Histon H3<br>(15)       | <i>rabbit</i> | WB       | 1:2000<br>in 5 % BSA / TBS-T                                         | Abcam, Cambridge, England                     |
| HuR<br>(32)             | <i>mouse</i>  | WB/IF/IH | 1:4000<br>in 5 % BSA / TBS-T (WB)<br>1:500 in PBS (IF)<br>1: 50 (IH) | Santa Cruz Biotechnology, Inc., Dallas, USA   |
| Ki-67<br>(320)          | <i>mouse</i>  | IF       | 1:100 in PBS                                                         | BD Biosciences, Heidelberg, Germany           |
| MITF<br>(55)            | <i>mouse</i>  | WB       | 1:1000<br>in 5 % BSA / TBS-T                                         | Santa Cruz Biotechnology, Inc., Dallas, USA   |
| PML<br>(78, 97)         | <i>mouse</i>  | IF       | 1:200 in PBS                                                         | Santa Cruz Biotechnology, Inc., Dallas, USA   |

**Table S3.** List of secondary antibodies.

| Name/Species                           | Method | Dilution        | Manufacturer                                |
|----------------------------------------|--------|-----------------|---------------------------------------------|
| Anti-Mouse-AP                          | WB     | 1:3000 in TBS-T | Cell Signaling Technology, Danvers, MA, USA |
| Anti-Mouse-HRP                         | WB     | 1:3000 in TBS-T | Cell Signaling Technology, Danvers, MA, USA |
| Anti-Rabbit-AP                         | WB     | 1:3000 in TBS-T | Cell Signaling Technology, Danvers, MA, USA |
| Anti-Rabbit-HRP                        | WB     | 1:3000 in TBS-T | Cell Signaling Technology, Danvers, MA, USA |
| Alexa Fluor Plus 555 ( <i>mouse</i> )  | IF     | 1:500 in PBS    | Thermo Fisher Scientific, Waltham, MA, USA  |
| Alexa Fluor Plus 555 ( <i>rabbit</i> ) | IF     | 1:1000 in PBS   | Thermo Fisher Scientific, Waltham, MA, USA  |

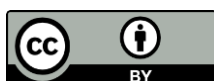

© 2020 by the authors. Licensee MDPI, Basel, Switzerland. This article is an open access article distributed under the terms and conditions of the Creative Commons Attribution (CC BY) license (<http://creativecommons.org/licenses/by/4.0/>).
